# Supplementary material for: Bioadhesive Hyaluronic Acid/Dopamine Hydrogels for Vascular Applications Prepared by Initiator-Free Crosslinking
Source: MDPI journal article supplement (doi:10.3390/ijms23105706), 2022-05-20
Supplement: s1 [file s1]

# Bioadhesive hyaluronic acid/dopamine hydrogels for vascular applications prepared by initiator-free crosslinking

Tamara Melnik, Senda Ben Ameer, Nasreddine Kanfar, Laurent Vinet, Florence Delie and Olivier Jordan

Supplementary materials.

**Table S1.** Size exclusion chromatography-multiangle light scattering measurement of  $M_n$ ,  $M_w$  and PDI of the raw HA

|               | AVG (n=3) | SD      |
|---------------|-----------|---------|
| $M_n$ [g/mol] | 1.67E+05  | 8.7E+03 |
| $M_w$ [g/mol] | 1.90E+05  | 2.5E+03 |
| PDI           | 1.1       | 0.0     |

**Table S2.** Gradient of mobile phases for U-HPLC detection of atorvastatin

| <i>Time (minutes)</i> | <i>A, 10 mM Ammonium formate + 0.1 formic acid, [%]</i> | <i>B, acetonitrile + 0.1 formic acid, [%]</i> |
|-----------------------|---------------------------------------------------------|-----------------------------------------------|
| 0.0                   | 60                                                      | 40                                            |
| 3.2                   | 20                                                      | 80                                            |
| 3.3                   | 60                                                      | 40                                            |
| 5.0                   | 60                                                      | 40                                            |

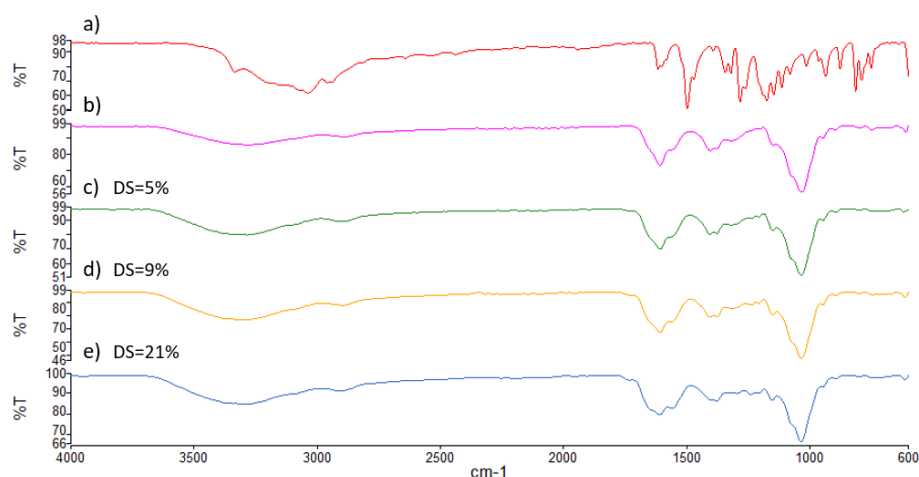

**Figure S1.** FTIR spectra of a) dopamine, b) hyaluronic acid, c-e) HA-dopamine with different degrees of substitution. The amide bond, confirming the successful conjugation of dopamine to HA is seen at 1610 cm<sup>-1</sup>, coinciding with C=O group of HA. The wide band at 3280 cm<sup>-1</sup> represents the hydroxyl groups of HA. The stretching vibrations belonging to dopamine's C-H at 2920 cm<sup>-1</sup> and C=C at 1520 cm<sup>-1</sup>, are also present in the HA-Dop, however, to a less extent, as it is less concentrated than pure dopamine.

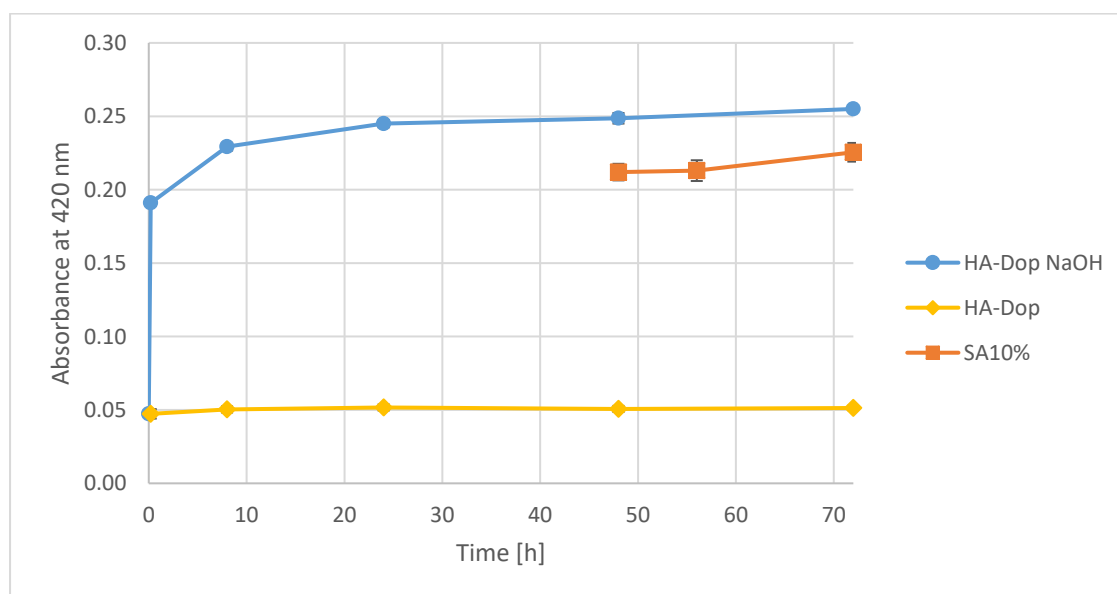

**Figure S2.** UV absorbance at 420 nm (quinone) of HA-Dop (DS 9%), with addition of NaOH and sodium ascorbate (SA) at 48 h, n=3.

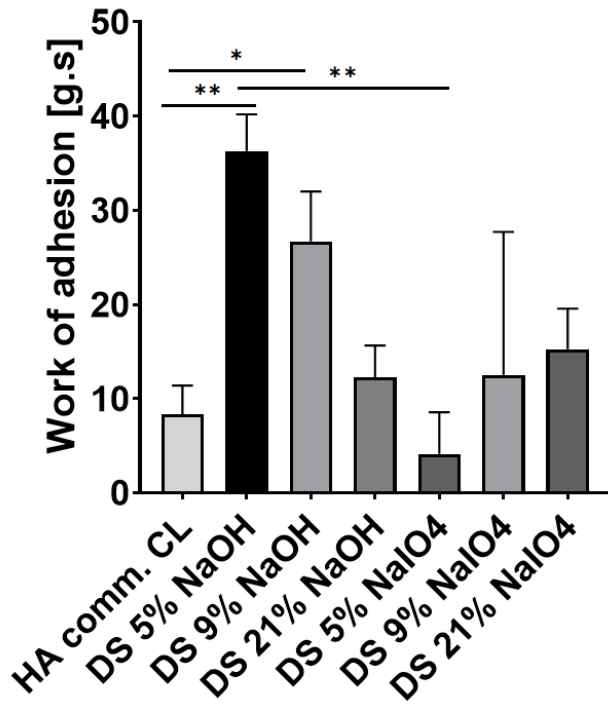

**Figure S3.** Work of adhesion of different gels measured on Texture Analyzer with porcine aorta tissues. \*  $p \leq 0.01$ ; \*\*  $p \leq 0.0001$ .

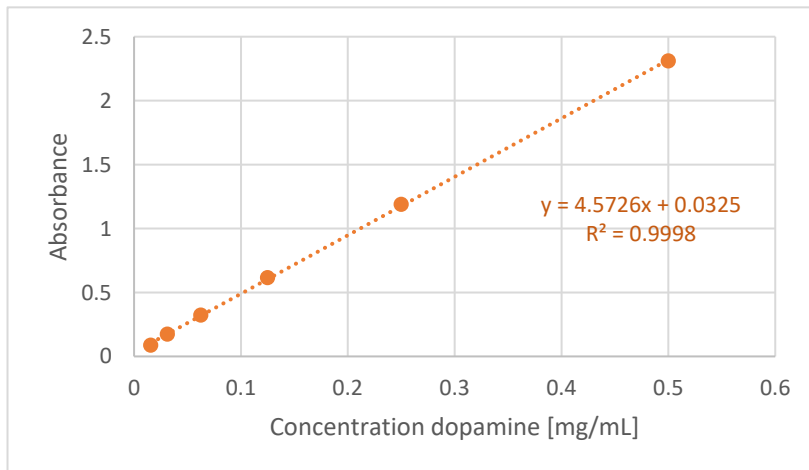

**Figure S4.** Dopamine calibration curve in dH<sub>2</sub>O at 280 nm

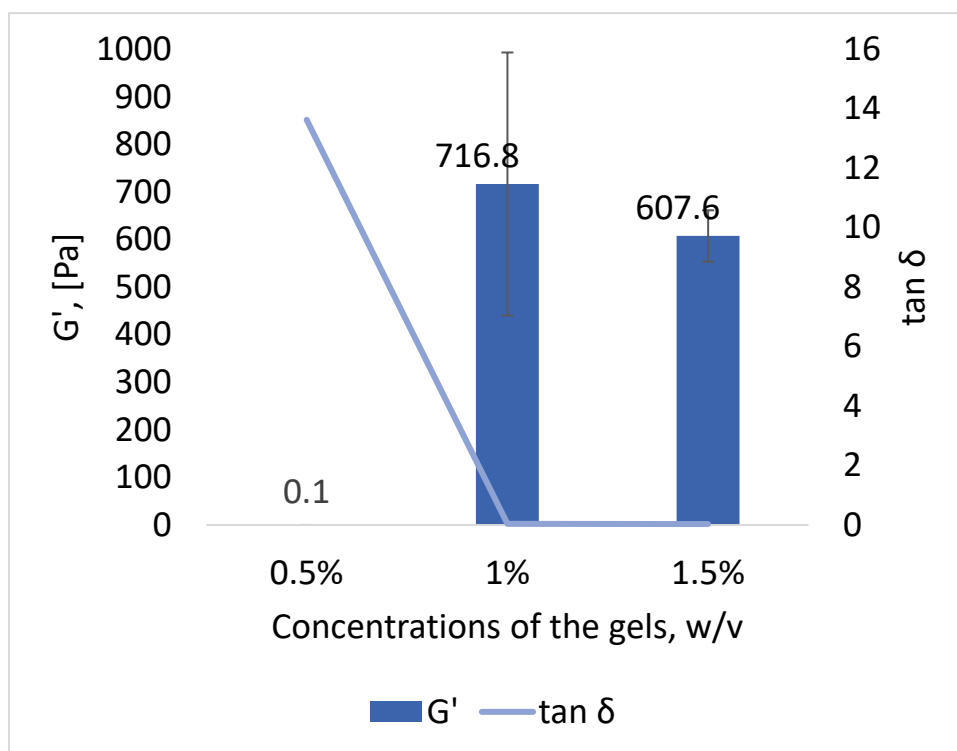

**Figure S5.** Evolution of  $G'$  and  $\tan \delta$  of cross-linked by 1:2  $\text{NaIO}_4$  gels (DS 9%) at different concentrations from 0.5% to 1.5%,  $n = 3$ , error bars = SD. The 0.5% is a liquid solution, while 1.0% and 1.5% are too rigid and inhomogenous for perivascular application.

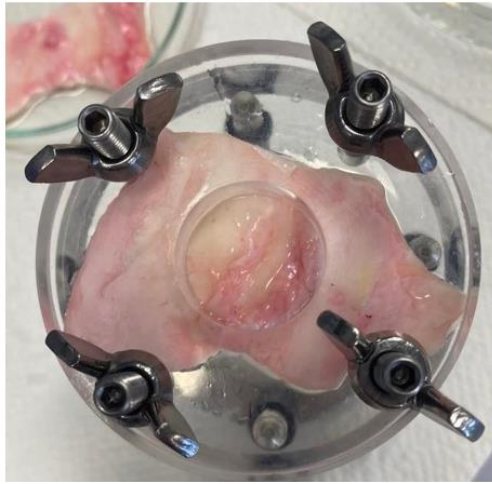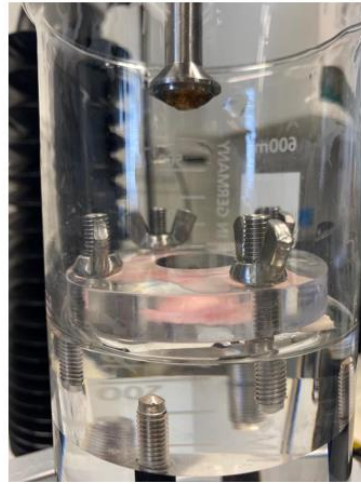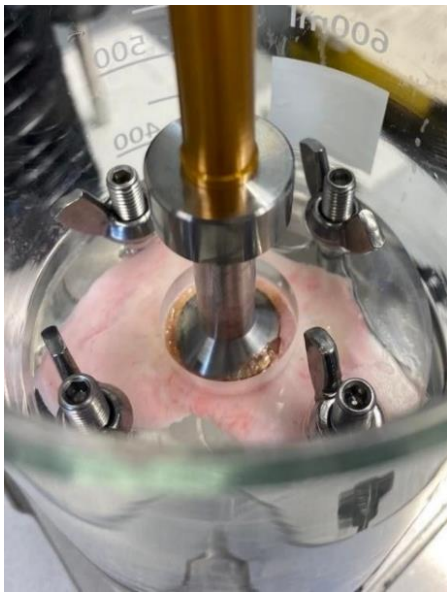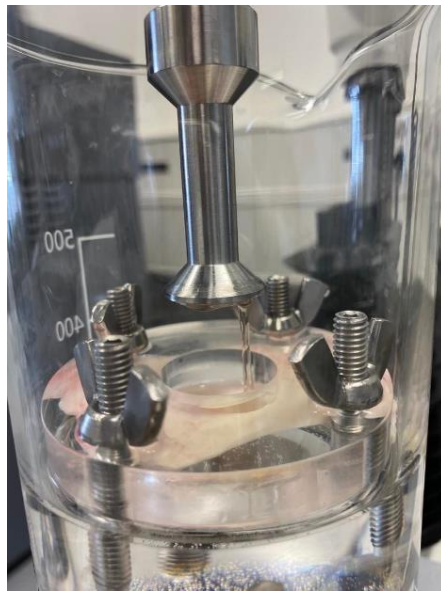

**Figure S6.** Bioadhesion testing set-up, views from different angles.

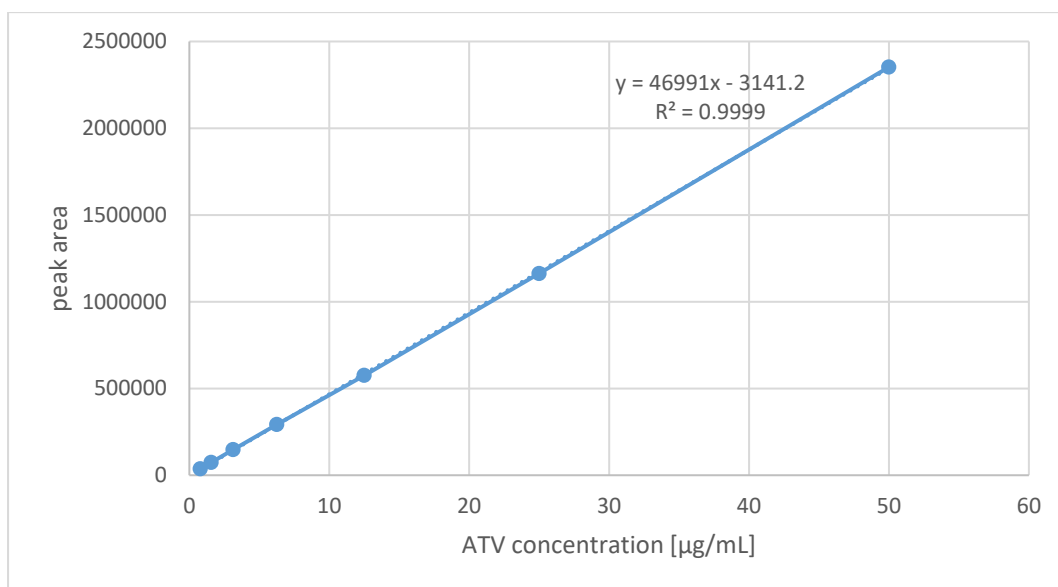

**Figure S7.** Calibration curve of atorvastatin obtained by monitoring eluates of calibration standards at 245 nm
